# Supplementary material for: Combining network topology and information theory to construct representative brain networks
Source: PubMed Central journal article supplement (PMC7935031; doi:10.1162/netn_a_00170), 2021-02-01
Supplement: netn-05-96-s001.pdf [file netn-05-96-s001.pdf]

# Combining Network Topology and Information Theory to Construct Representative Brain Networks

Andrea I. Luppi<sup>a,b</sup>, Emmanuel A. Stamatakis<sup>a,b</sup>

<sup>a</sup>Division of Anaesthesia, School of Clinical Medicine, University of Cambridge, United Kingdom

<sup>b</sup>Department of Clinical Neurosciences, University of Cambridge, Cambridge, United Kingdom

## Supplementary Information

### Supplementary Figures

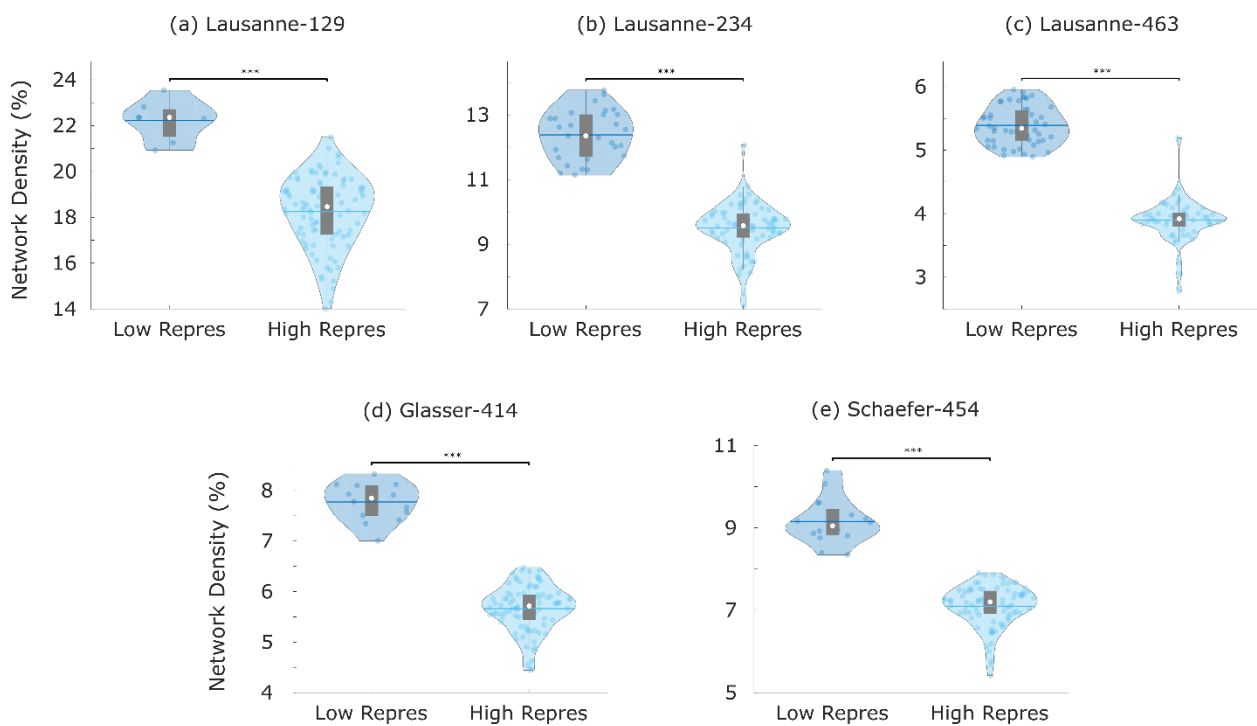

**Supplementary Figure 1. Lower-representativeness of weighted structural networks corresponds to significantly higher network density.** For weighted structural networks exhibiting bimodality in the distribution of representativeness (Figure 3b), subjects were divided into higher-representativeness and lower-representativeness groups, based on which of the two modes of the distribution they clustered around. For each parcellation (a-c, Lausanne-129, 234 and 463; d, Glasser-414; e, Schaefer-454), subjects with lower representativeness had significantly higher network density. Repres, representativeness. White circle, mean; center line, median; box limits, upper and lower quartiles; whiskers, 1.5x interquartile range. \*\*\*  $p < 0.001$ .

## Topological Criterion to Construct Representative Brain Networks

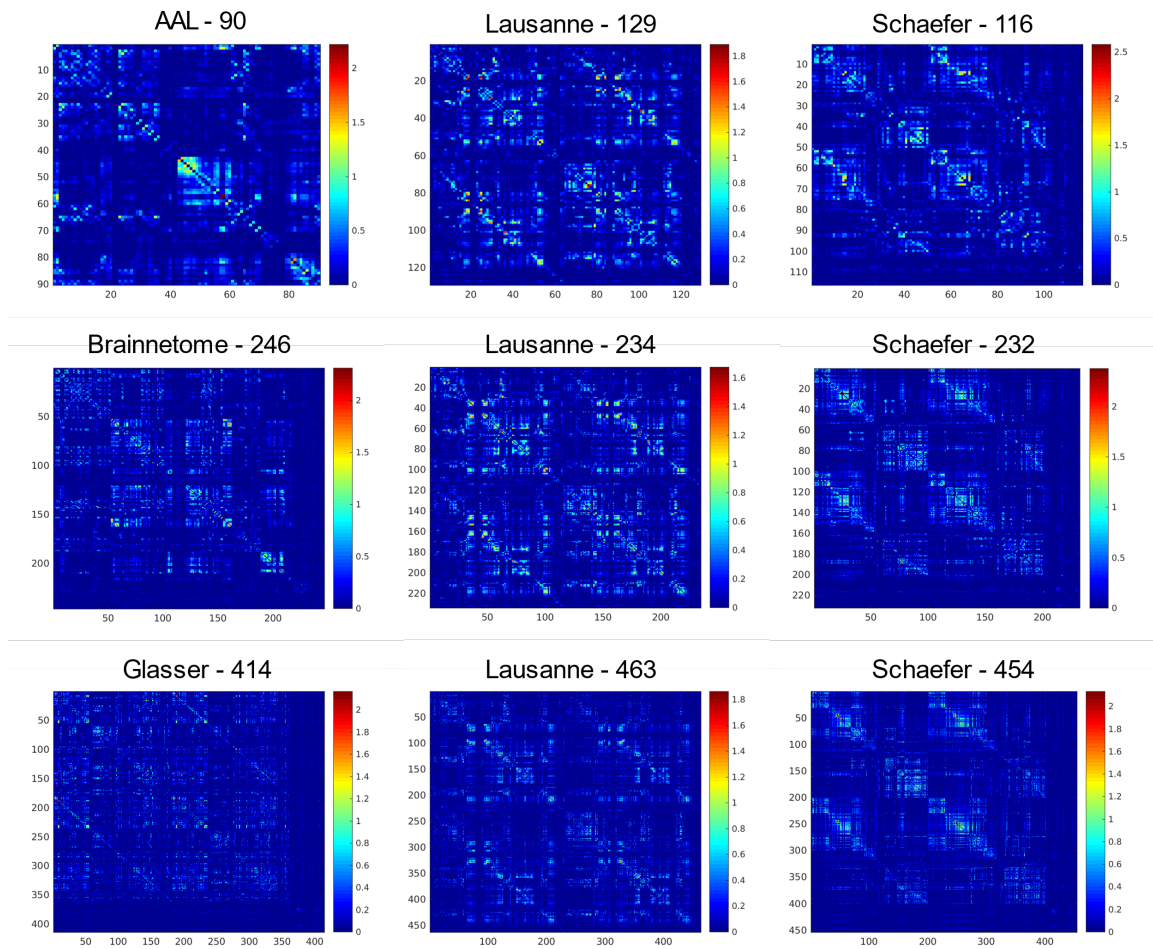

26  
27  
28  
29  
30  
31  
32

**Supplementary Figure 2. Functional connectome of the same individual according to different parcellations, based on mutual information.** Matrix entries indicate the mutual information between the BOLD signal of the corresponding brain regions, obtained from resting-state fMRI of one representative HCP subject. Matrices are here shown before normalisation in the range 0-1, and therefore values may exceed unity.

## Topological Criterion to Construct Representative Brain Networks

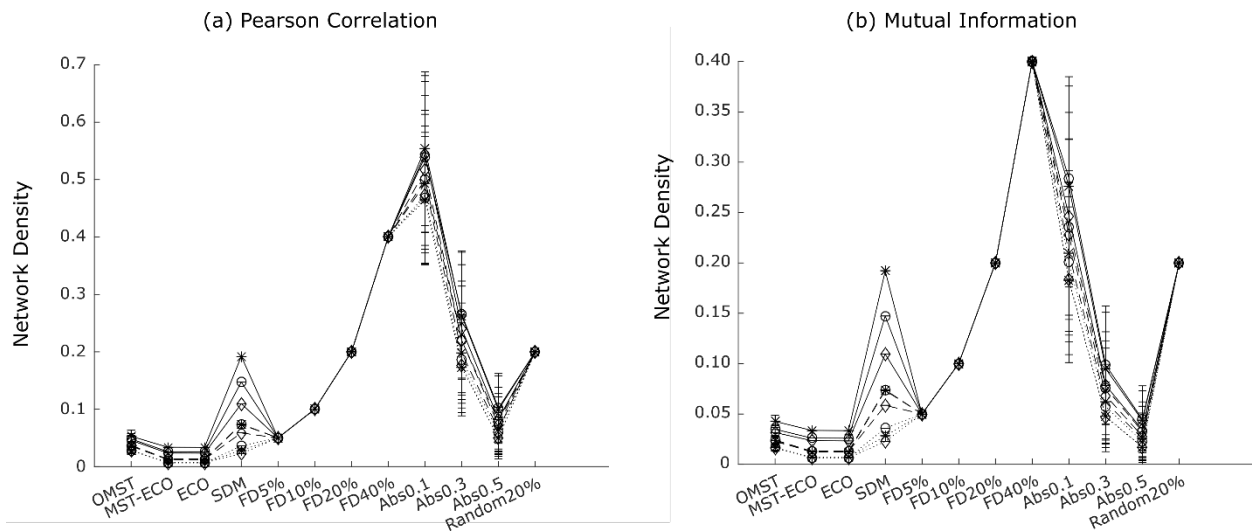

33  
34 **Supplementary Figure 3.** Density of functional networks (mean and standard deviation) based on Pearson correlation  
35 (a) and mutual information (b) across different filtering schemes, and for different parcellations. OMST, Orthogonal  
36 Minimum Spanning Trees. ECO, Efficiency-Cost Optimisation. SDM, Structural Density Matching. FD, Fixed  
37 Density. Abs, absolute thresholding. Solid lines: scale-100 parcellations. Dashed lines: scale-200 parcellations. Dotted  
38 lines: scale-400 parcellations. Diamond: anatomical parcellations (Lausanne). Circle: functional parcellations  
39 (Schaefer). Asterisk: mixed parcellations (AAL, Brainnetome, Glasser).

40  
41

### 42 [Supplementary Tables](#)

43

44 **Supplementary Table 1.** Minimum network density (as a percentage of total possible edges) across parcellations  
45 and filtering schemes, for networks of functional connectivity based on Pearson correlation.

46

|                     | OMST | EC<br>O | ECO<br>-<br>MST | SD<br>M | FD<br>- | FD-<br>10<br>% | FD-<br>20<br>% | FD-<br>40<br>% | Abs0.<br>1 | Abs0.<br>3 | Abs0.5 | Rand<br>20% |
|---------------------|------|---------|-----------------|---------|---------|----------------|----------------|----------------|------------|------------|--------|-------------|
| AAL-90              | 4.4  | 3.4     | 3.3             | 19.2    | 5.0     | 10.<br>0       | 20.<br>0       | 40.<br>0       | 32.2       | 10.8       | 3.2    | 20.0        |
| Brainnetome<br>-246 | 2.4  | 1.2     | 1.2             | 7.3     | 5.0     | 10.<br>0       | 20.<br>0       | 40.<br>0       | 29.9       | 7.4        | 2.1    | 20.0        |
| Glasser-414         | 1.9  | 0.7     | 0.7             | 2.8     | 5.0     | 10.<br>0       | 20.<br>0       | 40.<br>0       | 28.5       | 6.5        | 1.5    | 20.0        |
| Lausanne-<br>129    | 3.1  | 2.3     | 2.3             | 10.9    | 5.0     | 10.<br>0       | 20.<br>0       | 40.<br>0       | 32.8       | 8.9        | 2.5    | 20.0        |
| Lausanne-<br>234    | 2.6  | 1.3     | 1.3             | 5.9     | 5.0     | 10.<br>0       | 20.<br>0       | 40.<br>0       | 31.6       | 8.3        | 2.2    | 20.0        |
| Lausanne-<br>463    | 2.2  | 0.6     | 0.6             | 2.3     | 5.0     | 10.<br>0       | 20.<br>0       | 40.<br>0       | 29.3       | 6.6        | 1.3    | 20.0        |
| Schaefer-116        | 3.4  | 2.6     | 2.6             | 14.7    | 5.0     | 10.<br>0       | 20.<br>0       | 40.<br>0       | 32.2       | 11.1       | 3.0    | 20.0        |
| Schaefer-232        | 2.6  | 1.3     | 1.3             | 7.4     | 5.0     | 10.<br>0       | 20.<br>0       | 40.<br>0       | 30.7       | 8.6        | 2.5    | 20.0        |

## Topological Criterion to Construct Representative Brain Networks

|             |     |     |     |     |     |      |      |      |      |     |     |      |
|-------------|-----|-----|-----|-----|-----|------|------|------|------|-----|-----|------|
| Schaefer454 | 2.2 | 0.7 | 0.7 | 3.6 | 5.0 | 10.0 | 20.0 | 40.0 | 29.2 | 7.1 | 1.9 | 20.0 |
|-------------|-----|-----|-----|-----|-----|------|------|------|------|-----|-----|------|

47  
48  
49  
50

**Supplementary Table 2.** Minimum network density (as a percentage of total possible edges) across parcellations and filtering schemes, for networks of functional connectivity based on mutual information.

|                 | OMST | ECO | ECO-MST | SDM  | FD-5% | FD-10% | FD-20% | FD-40% | Abs0.1 | Abs0.3 | Abs0.5 | Rand20% |
|-----------------|------|-----|---------|------|-------|--------|--------|--------|--------|--------|--------|---------|
| AAL-90          | 2.2  | 3.4 | 3.3     | 19.2 | 5.0   | 10.0   | 20.0   | 40.0   | 11.2   | 2.9    | 1.2    | 20.0    |
| Brainnetome-246 | 1.6  | 1.2 | 1.2     | 7.3  | 5.0   | 10.0   | 20.0   | 40.0   | 8.0    | 2.0    | 0.7    | 20.0    |
| Glasser-414     | 1.4  | 0.7 | 0.7     | 2.8  | 5.0   | 10.0   | 20.0   | 40.0   | 7.0    | 1.4    | 0.4    | 20.0    |
| Lausanne-129    | 3.1  | 2.3 | 2.3     | 10.9 | 5.0   | 10.0   | 20.0   | 40.0   | 9.5    | 2.3    | 0.8    | 20.0    |
| Lausanne-234    | 1.7  | 1.3 | 1.3     | 5.9  | 5.0   | 10.0   | 20.0   | 40.0   | 8.9    | 2.0    | 0.6    | 20.0    |
| Lausanne-463    | 0.9  | 0.6 | 0.6     | 2.3  | 5.0   | 10.0   | 20.0   | 40.0   | 7.1    | 1.2    | 0.4    | 20.0    |
| Schaefer-116    | 1.7  | 2.6 | 2.6     | 14.7 | 5.0   | 10.0   | 20.0   | 40.0   | 12.4   | 2.8    | 1.2    | 20.0    |
| Schaefer-232    | 1.7  | 1.3 | 1.3     | 7.4  | 5.0   | 10.0   | 20.0   | 40.0   | 9.5    | 2.4    | 0.9    | 20.0    |
| Schaefer454     | 1.3  | 0.7 | 0.7     | 3.6  | 5.0   | 10.0   | 20.0   | 40.0   | 8.0    | 1.8    | 0.5    | 20.0    |

51
